# Supplementary material for: Interactions between β-Lactoglobulin and 3,3′-Diindolylmethane in Model System
Source: MDPI journal article supplement (doi:10.3390/molecules24112151), 2019-06-07
Supplement: s1 [file s1]

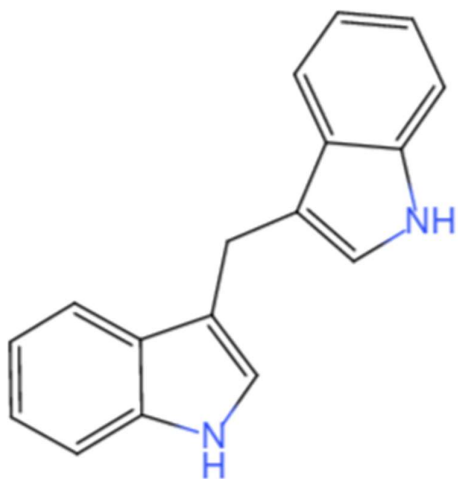

**Figure S1.** Structure of 3,3'-diindolylmethane (DIM)

Source: PubChem

URL: <https://pubchem.ncbi.nlm.nih.gov>

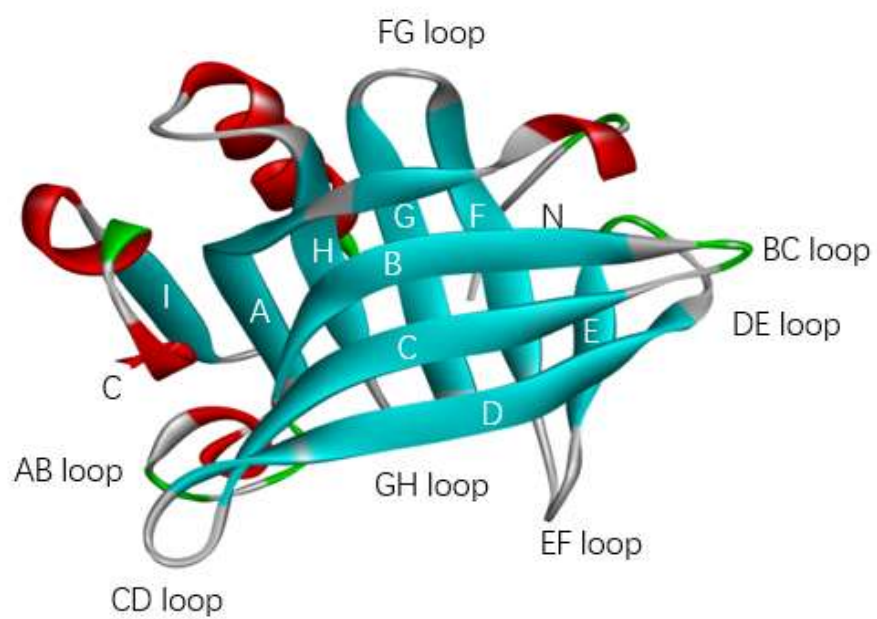

**Figure S2.** Monomeric unit of bovine  $\beta$ -lactoglobulin. The structure (3uew) was obtained from the Research Collaboratory for Structural Bioinformatics (RCSB) Protein Data Bank (<http://www.rcsb.org>)
